# Supplementary material for: Nanoscale ion intermixing induced activation of Fe2O3/MnO2 composites for application in lithium ion batteries
Source: Royal Society of Chemistry journal article supplement (doi:10.1039/c7ta00172j), 2017-01-01
Supplement: c7ta00172j1.pdf [file c7ta00172j1.pdf]

**Electronic Supplementary Information: Nanoscale ion intermixing induced activation of  $\text{Fe}_2\text{O}_3/\text{MnO}_2$  composites for application in lithium ion batteries**

Shiji Hao,<sup>‡a</sup> Bowei Zhang,<sup>‡b</sup> Jianyong Feng,<sup>b</sup> Yayuan Liu,<sup>b</sup> Sarah Ball,<sup>c</sup> Jisheng Pan,<sup>\*c</sup> Madhavi Srinivasan<sup>\*ab</sup> and Yizhong Huang<sup>\*ab</sup>

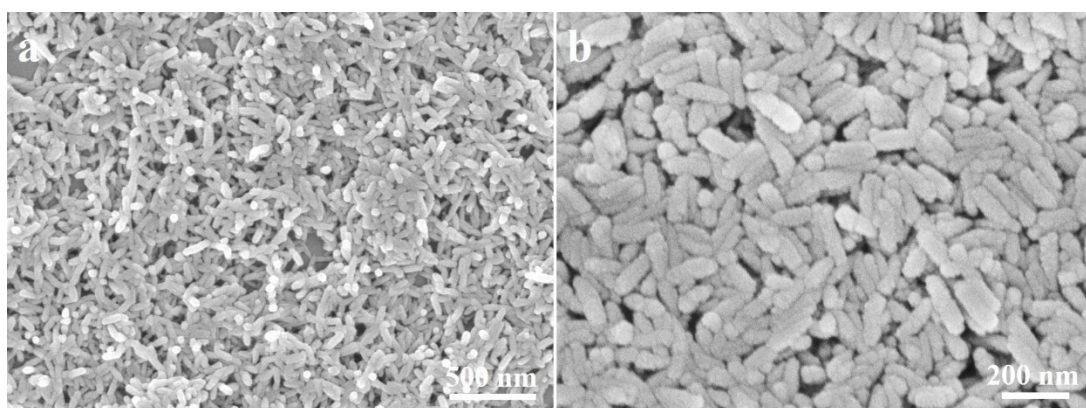

**Figure S1** FESEM images of FeOOH nanorods

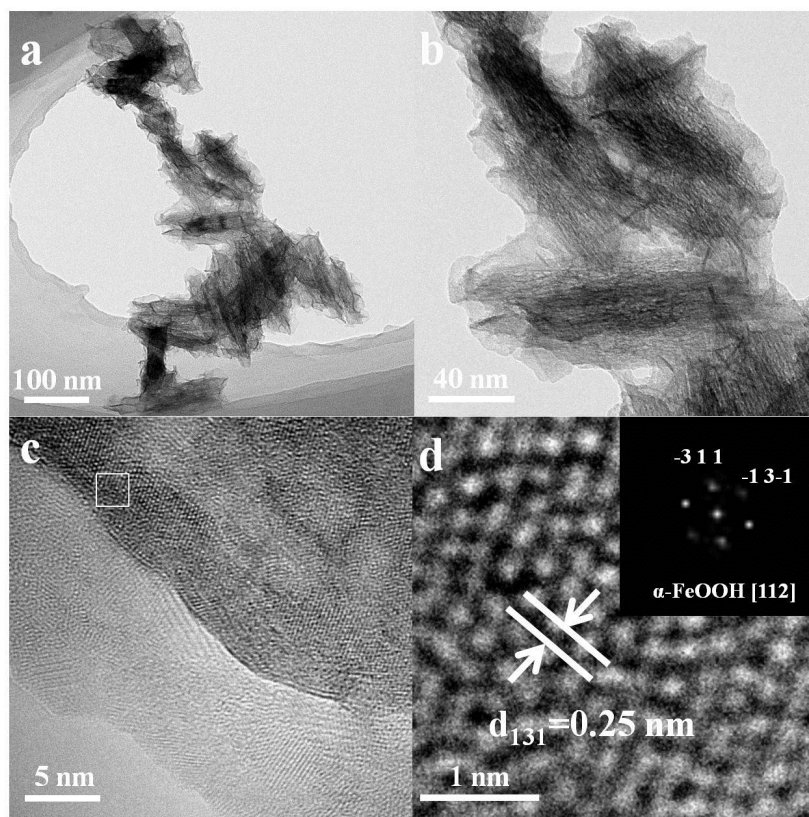

**Figure S2** TEM (a, b) and high resolution TEM (c, d) images of the FeOOH/MnO<sub>2</sub> nanorods.

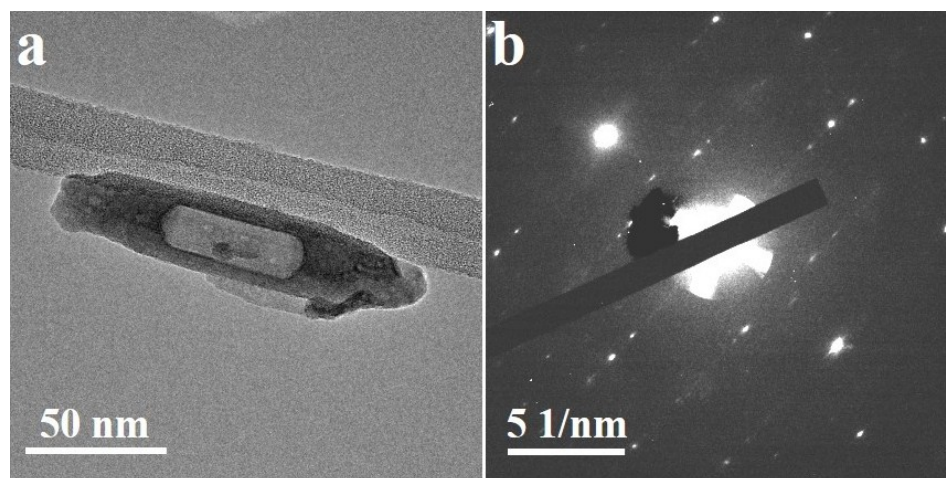

**Figure S3** TEM image (a) and SAED pattern (b) of the hollow-structured Fe<sub>2</sub>O<sub>3</sub>/MnO<sub>2</sub> nanorod.

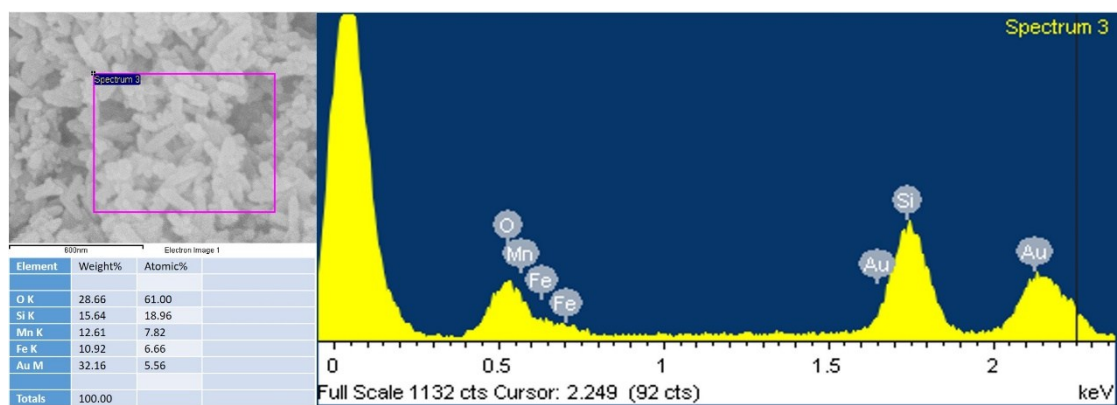

**Figure S4** EDX quantitative analysis of the hollow-structured  $\text{Fe}_2\text{O}_3/\text{MnO}_2$  composite on the selected region.

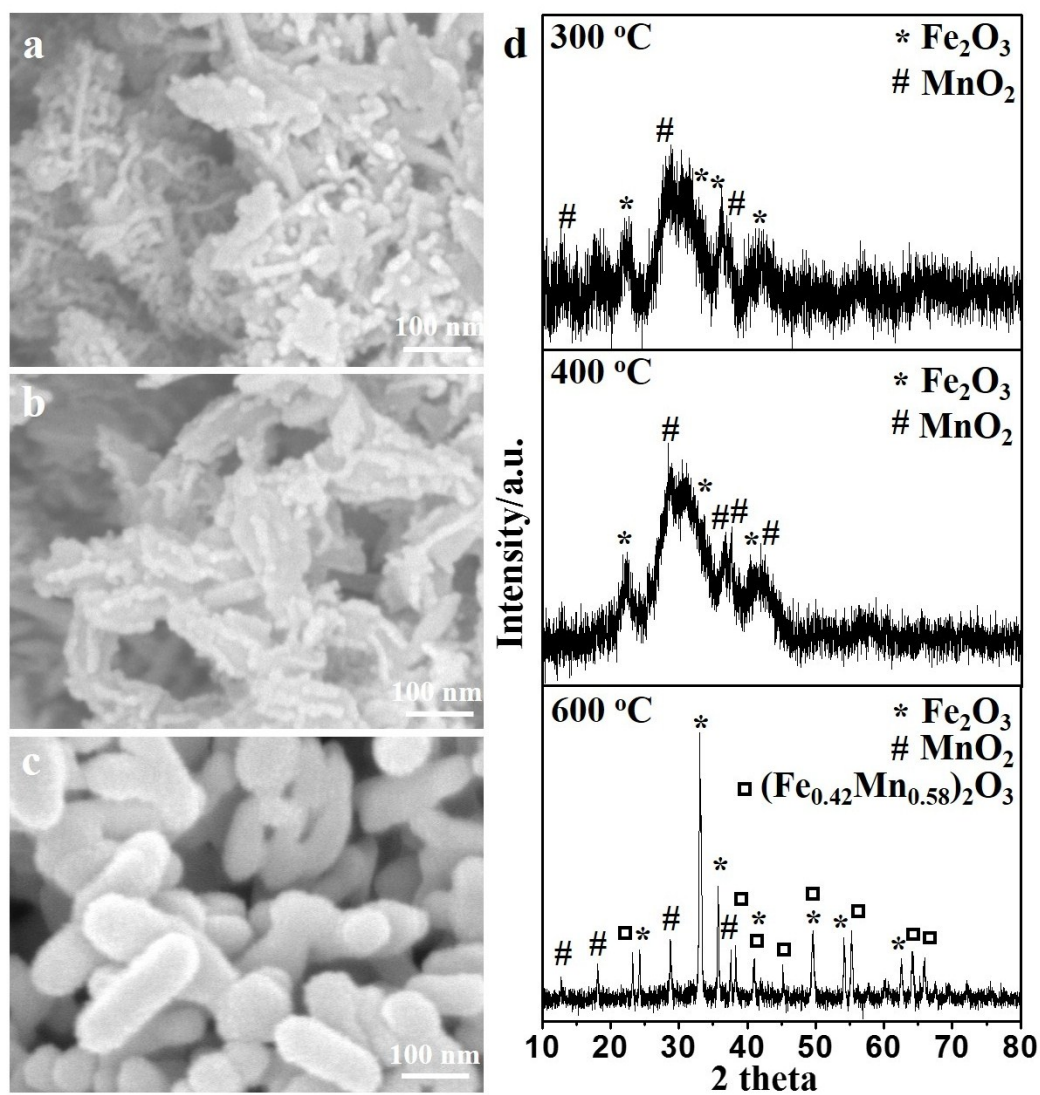

**Figure S5** SEM images and XRD patterns (d) of the as-obtained products from the subsequent annealing treatment of 300 (a), 400 (b) and 600 (c) °C.

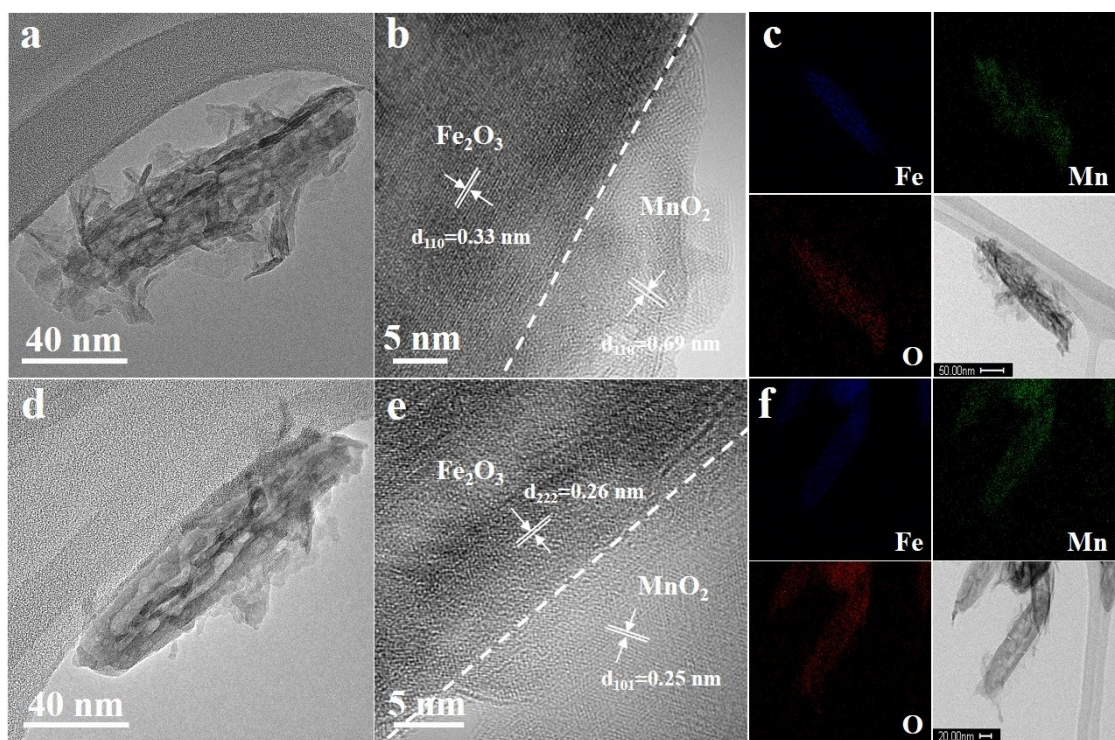

**Figure S6** TEM (a and d) and high resolution TEM (b and e) images and elemental mapping (c and f) of the as-obtained products at 300 and 400 °C, respectively.

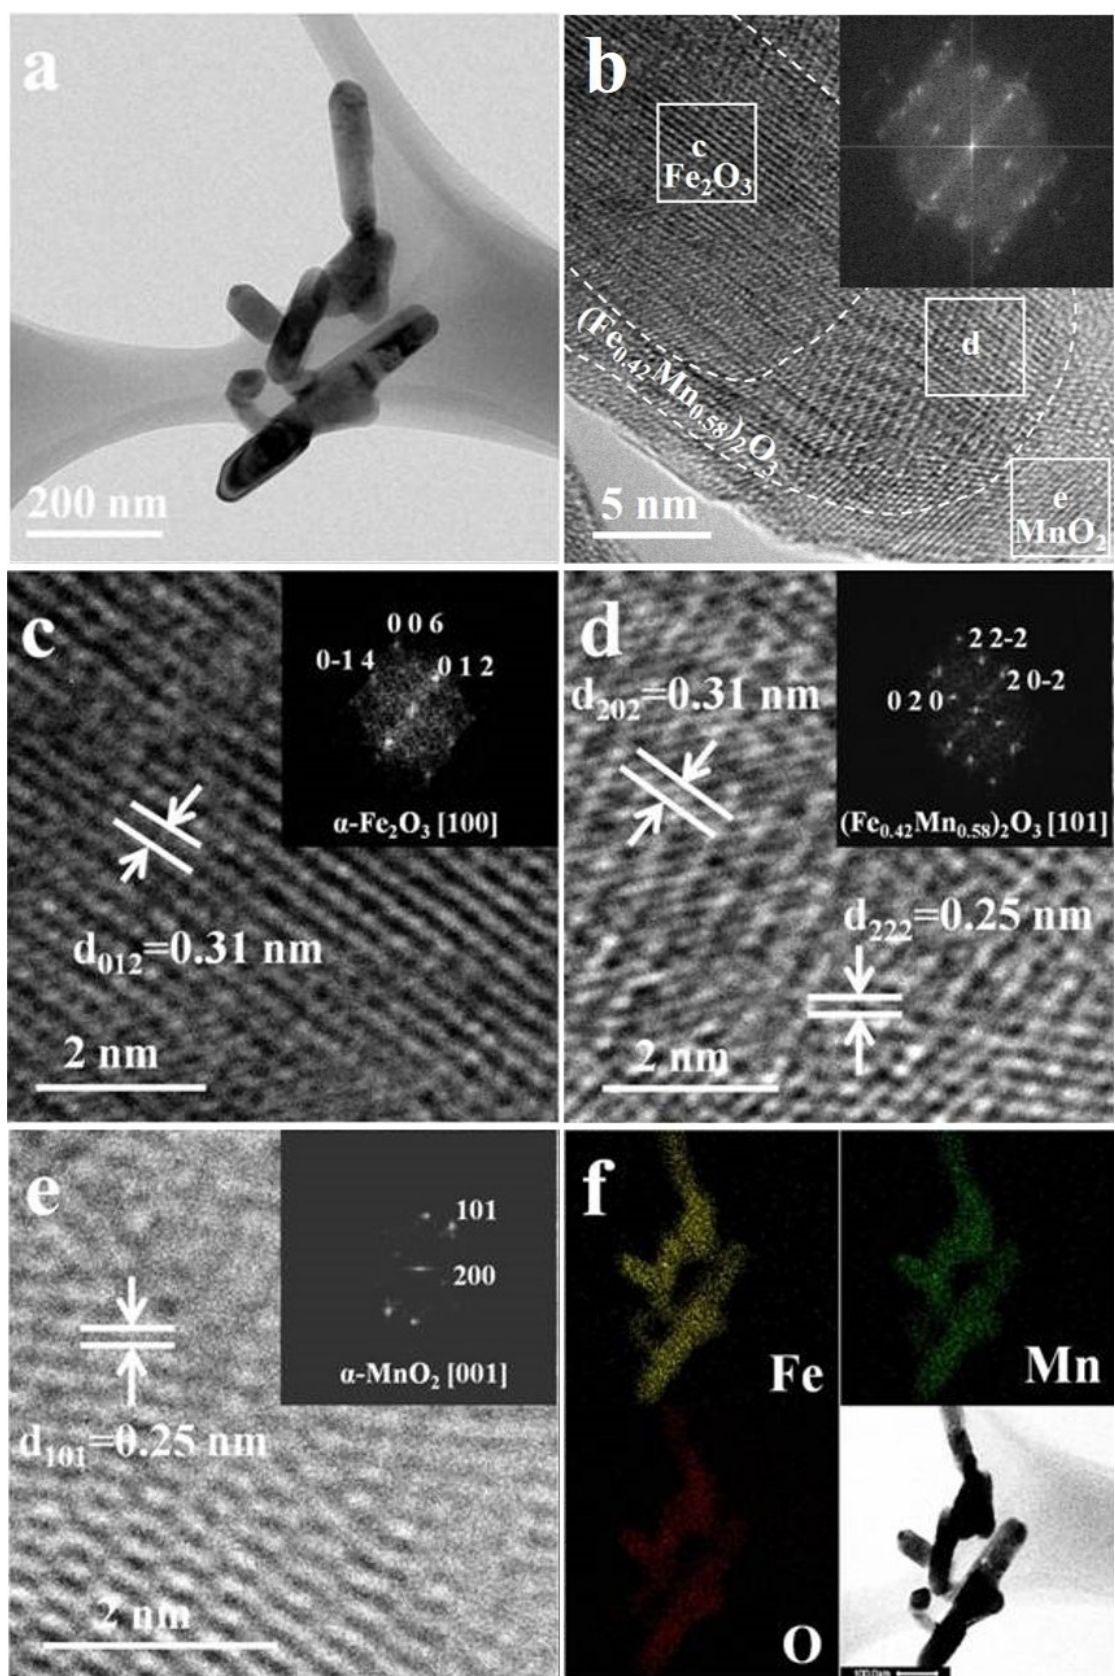

**Figure S7** TEM (a), high resolution TEM (b-e) images and elemental mapping (f) of the as-obtained product at 600 °C.

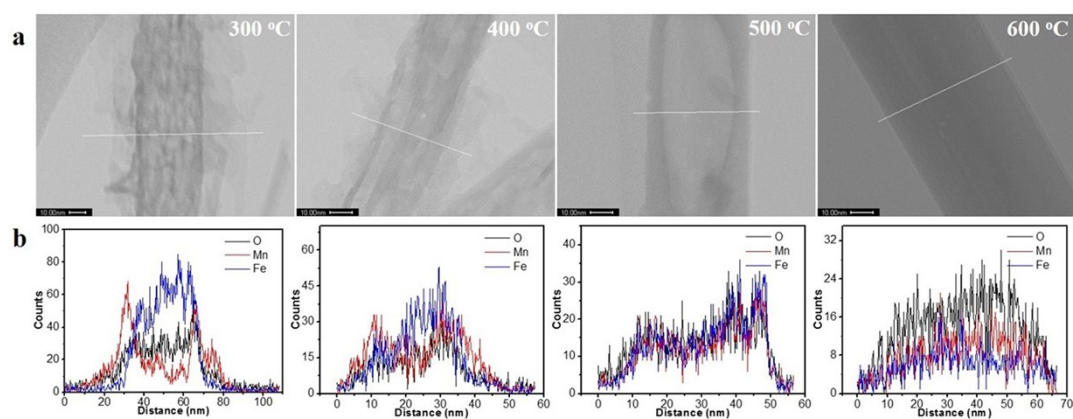

**Figure S8** Bright-field scanning TEM images (top) and corresponding EDX line-scanning profiles (bottom) of the products annealed at 300, 400, 500 and 600 °C.

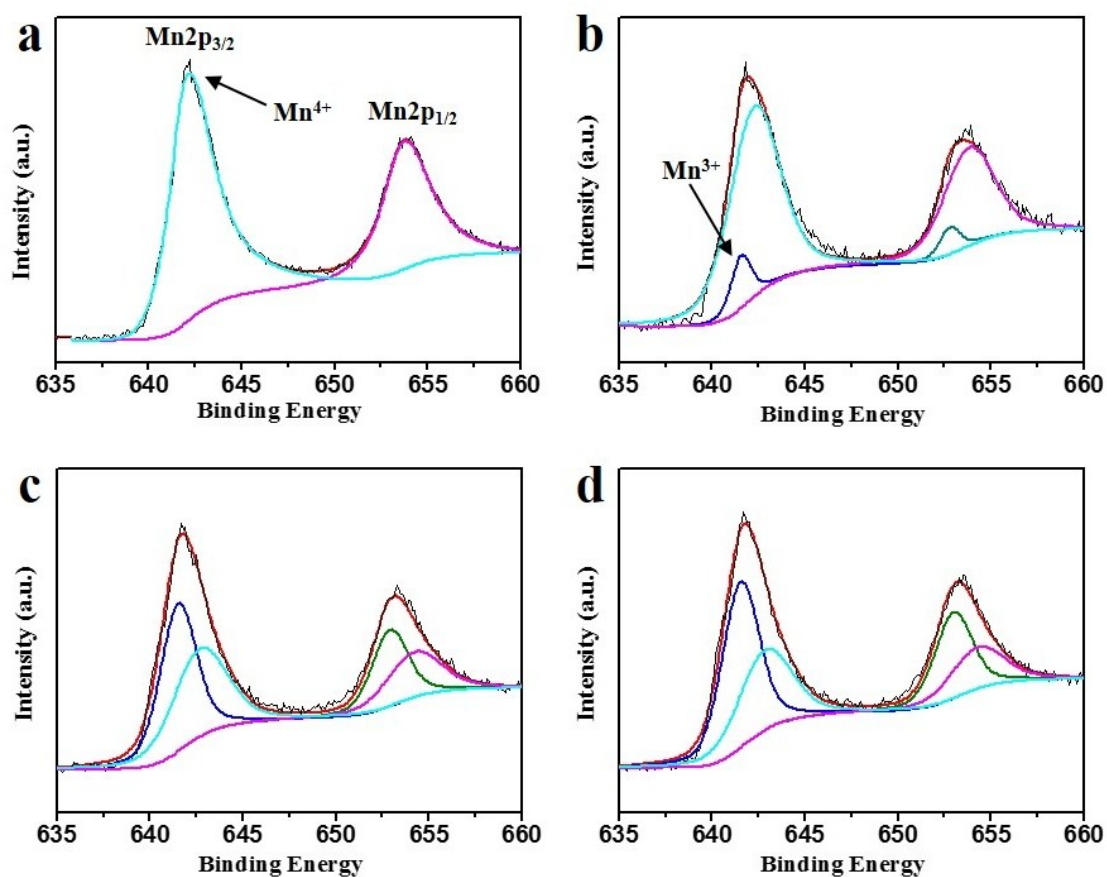

**Figure S9** High resolution Mn2p XPS spectrum for the products annealed at 300 (a), 400 (b), 500 (c) and 600 (d) °C.

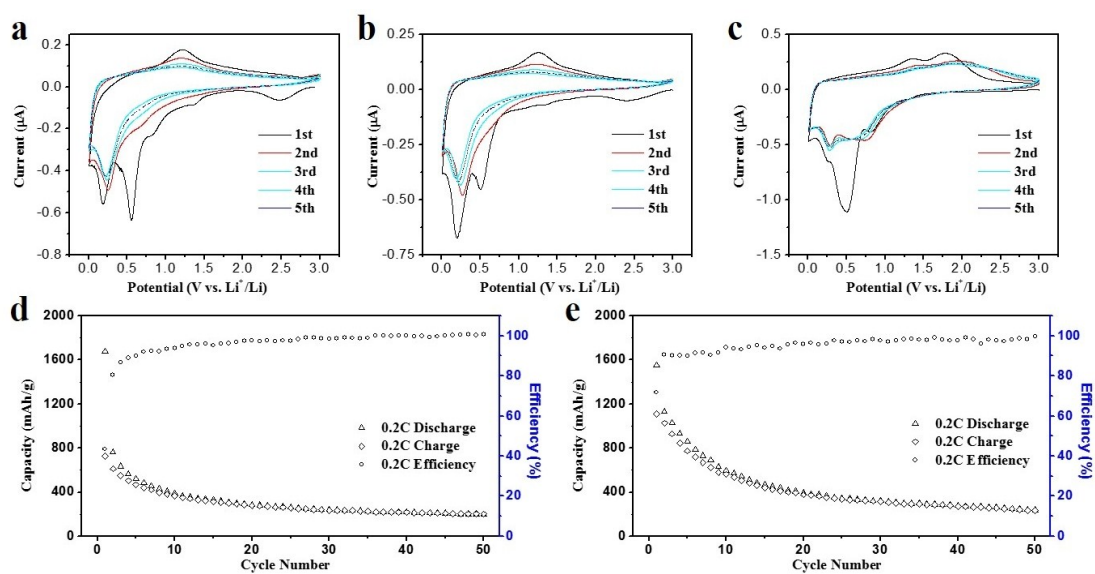

**Figure S10** the first five cyclic voltammogram (CV) curves of the Fe-Mn-300 (a), Fe-Mn-400 (b) and Fe-Mn-600 (c) anodes and cycling performance of the Fe-Mn-300 (d), Fe-Mn-400 (e) electrodes at a current of 0.2C.
